# Supplementary material for: Essential Oil Nanoemulsion as Eco-Friendly and Safe Preservative: Bioefficacy Against Microbial Food Deterioration and Toxin Secretion, Mode of Action, and Future Opportunities
Source: PubMed Central journal article supplement (PMC8667777; doi:10.3389/fmicb.2021.751062), 2021-11-29
Supplement: Table_1.pdf [file Table_1.pdf]

Table 1 Antibacterial efficacy of EOs nanoemulsion in foods

| S. No.            | EO/Component nanoemulsion | Effective constitutes                                            | Biopolymer                          | Fabrication Method | Effective over/ Test organism | Key findings                                                                                                                                                                                                                                                                                                                                         | References           |
|-------------------|---------------------------|------------------------------------------------------------------|-------------------------------------|--------------------|-------------------------------|------------------------------------------------------------------------------------------------------------------------------------------------------------------------------------------------------------------------------------------------------------------------------------------------------------------------------------------------------|----------------------|
| <b>Gram (+)ve</b> |                           |                                                                  |                                     |                    |                               |                                                                                                                                                                                                                                                                                                                                                      |                      |
| 1                 | <i>Piper nigrum</i>       | $\beta$ - caryophyllene, limonene, $\delta$ -3-carene and pinene | Hydroxypropyl $\beta$ -cyclodextrin | Inclusion complex  | <i>Staphylococcus aureus</i>  | <ul style="list-style-type: none"> <li>• Minimum Inhibitory Concentration (MIC): MIC value of Nanoemulsion of, black pepper was improved 4 times against the <i>S. aureus</i> (from 1000 to 250 <math>\mu\text{g/mL}</math>).</li> <li>• Effective mechanism: Encapsulated oil primarily acted on cell membrane and inside the cytoplasm.</li> </ul> | Rakmai et al. (2017) |

|   |                                                        |                                                                                                                                |                                            |                   |                                              |                                                                                                                                                                                                                                                                                                                                   |                       |
|---|--------------------------------------------------------|--------------------------------------------------------------------------------------------------------------------------------|--------------------------------------------|-------------------|----------------------------------------------|-----------------------------------------------------------------------------------------------------------------------------------------------------------------------------------------------------------------------------------------------------------------------------------------------------------------------------------|-----------------------|
| 2 | <i>Eugenia caryophyllata</i>                           | Eugenol and $\beta$ - caryophyllene                                                                                            | Chitosan                                   | Ionic gelation    |                                              | <ul style="list-style-type: none"> <li>• Minimum inhibitory volume (MIV) of oil loaded nanoparticle is 2 <math>\mu</math>L against <i>S. aureus</i> and <i>L. monocytogenes</i></li> <li>• Effective mechanism: Nano-sized Clove EO can penetrate bacterial cell wall and destroyed cell membrane.</li> </ul>                     | Hadidi et al. (2020)  |
| 3 | <i>Origanum vulgare</i><br><br><i>Thymus capitatus</i> | Thymol, $\gamma$ - terpinene, and Cymene<br><br>Carvacrol, <i>p</i> -Cymene, $\beta$ - caryophyllene, and $\gamma$ - terpinene | Polymeric poly ( $\epsilon$ -caprolactone) | Nanoprecipitation | <i>S. aureus</i> and <i>L. monocytogenes</i> | <ul style="list-style-type: none"> <li>• MIC of <i>Thymus</i> nanoemulsion against <i>S. aureus</i> and <i>L. monocytogenes</i> was 0.5 and 0.25 mg/mL, respectively.</li> <li>• In case of <i>O. vulgare</i> nanoemulsion MIC was 0.5 and 1 mg/mL against <i>S. aureus</i> and <i>L. monocytogenes</i>, respectively.</li> </ul> | Granata et al. (2018) |

|   |                         |                          |          |                |  |                                                                                                                                                                                                                                                                                         |                   |
|---|-------------------------|--------------------------|----------|----------------|--|-----------------------------------------------------------------------------------------------------------------------------------------------------------------------------------------------------------------------------------------------------------------------------------------|-------------------|
|   |                         |                          |          |                |  | <ul style="list-style-type: none"> <li>• Effective mechanism: Effective constituents of EO encapsulated in polycaprolactone able to interact with outer cell membrane, increasing permeability and fluidity, which causes structural and functional damage to cell membrane.</li> </ul> |                   |
| 4 | <i>Moringa oleifera</i> | Palmitic acid and phytol | Chitosan | Ionic gelation |  | <ul style="list-style-type: none"> <li>• <i>M. oleifera</i> nanoemulsion acted as promising antibacterial agent against <i>S. aureus</i> and <i>L. monocytogenes</i> at 4 °C and 25 °C during 10 days storage of cheese without affecting</li> </ul>                                    | Lin et al. (2019) |

|                   |                     |   |                                          |                              |                                                                                     |                                                                                                                                                                                                                              |                      |
|-------------------|---------------------|---|------------------------------------------|------------------------------|-------------------------------------------------------------------------------------|------------------------------------------------------------------------------------------------------------------------------------------------------------------------------------------------------------------------------|----------------------|
|                   |                     |   |                                          |                              |                                                                                     | <p>organoleptic properties.</p> <ul style="list-style-type: none"> <li>• Effective mechanism: After treatment bacteria with encapsulated oil disturbed the cell membrane resulting the leakage of cell contents.</li> </ul>  |                      |
| 5                 | d-Limonene          | - | $\epsilon$ -polylysine ( $\epsilon$ -PL) | High pressure Homogenization | <i>S. aureus</i><br><i>Bacillus subtilis</i> and<br><i>Saccharomyces cerevisiae</i> | <ul style="list-style-type: none"> <li>• d-limonene nanoemulsion encapsulated into <math>\epsilon</math>-PL resulted in synergistic antimicrobial activity against the wide range Gram +ve and Gram –ve bacteria.</li> </ul> | Zahi et al. (2017)   |
| <b>Gram (-)ve</b> |                     |   |                                          |                              |                                                                                     |                                                                                                                                                                                                                              |                      |
| 6                 | <i>Piper nigrum</i> | - | Hydroxypropyl $\beta$ -cyclodextrin      | Inclusion complex            |                                                                                     | <ul style="list-style-type: none"> <li>• Minimum Inhibitory Concentration (MIC): Improvement in MIC</li> </ul>                                                                                                               | Rakmai et al. (2017) |

|   |                         |   |                                              |            |                         |                                                                                                                                                                                                                                                                                                                                            |                        |
|---|-------------------------|---|----------------------------------------------|------------|-------------------------|--------------------------------------------------------------------------------------------------------------------------------------------------------------------------------------------------------------------------------------------------------------------------------------------------------------------------------------------|------------------------|
|   |                         |   |                                              |            | <i>Escherichia coli</i> | <p>value from against <i>E. coli</i> from 2000 to 500 µg/mL.</p> <ul style="list-style-type: none"> <li>• Effective mechanism- Encapsulated oil primarily acted on cell membrane and cytoplasm</li> </ul>                                                                                                                                  |                        |
| 7 | <i>Thymus daenensis</i> | - | Tween 80 (2% w/w), and lecithin (0.001% w/w) | Sonication |                         | <ul style="list-style-type: none"> <li>• Minimum Inhibitory Concentration (MIC): The nanoemulsion showed effective inhibitory action against <i>E. coli</i> with MIC 0.4 mg/mL.</li> <li>• Effective mechanism: The formulation inhibited the <i>E. coli</i> population by enhancing mechanism of action, bringing the EOs into</li> </ul> | Moghimi et al. (2016b) |

|   |                        |                                                                           |                         |              |  |                                                                                                                                                                                                                                                                                                                                                                                                                                                                                              |                      |
|---|------------------------|---------------------------------------------------------------------------|-------------------------|--------------|--|----------------------------------------------------------------------------------------------------------------------------------------------------------------------------------------------------------------------------------------------------------------------------------------------------------------------------------------------------------------------------------------------------------------------------------------------------------------------------------------------|----------------------|
|   |                        |                                                                           |                         |              |  | close proximity with the plasma membrane.                                                                                                                                                                                                                                                                                                                                                                                                                                                    |                      |
| 8 | <i>Thymus vulgaris</i> | Thymol, para-cymene, linalool, terpinene, $\alpha$ -pinene, and carvacrol | Casein and maltodextrin | Spray drying |  | <ul style="list-style-type: none"> <li>• Minimum Inhibitory Concentration (MIC): Encapsulated EO showed 0.1 mg/mL MIC value against <i>S. typhimurium</i>, <i>L. monocytogens</i>, <i>S. aureus</i> and <i>E. coli</i>.</li> <li>• Effective mechanism: Encapsulated EO showed higher antimicrobial activity in comparison to thyme EO through slow release of volatile components that protected by wall materials during <i>in situ</i> storage of hamburger like meat product.</li> </ul> | Radünz et al. (2020) |

|    |                               |                                                    |                           |                   |  |                                                                                                                                                                                                                                                          |                       |
|----|-------------------------------|----------------------------------------------------|---------------------------|-------------------|--|----------------------------------------------------------------------------------------------------------------------------------------------------------------------------------------------------------------------------------------------------------|-----------------------|
| 9  | <i>Urtica dioica</i>          | Carvacrol, carvone, naphthalene, and anethol       | Chitosan                  | Ionic gelation    |  | <ul style="list-style-type: none"> <li>The nanoencapsulated nettle EO boosted the antibacterial activity against the foodborne bacteria viz. <i>S. aureus</i>, <i>L. monocytogenes</i>, <i>S. typhi</i>, <i>E. coli</i>, and <i>B. cereus</i></li> </ul> | Bagheri et al. (2021) |
| 10 | <i>Melaleuca alternifolia</i> | Terpinene-4-ol, $\gamma$ -terpinene, and terpinene | $\beta$ -cyclodextrin     | Inclusion complex |  | <ul style="list-style-type: none"> <li>TTO/ <math>\beta</math>-CD inclusion complex enhanced the shelf life of beef against <i>E. coli</i> and inhibited 99.99% food spoilage bacteria at 4 °C over 7 days storage.</li> </ul>                           | Cui et al. (2018)     |
| 11 | <i>Cinnamomum zeylanicum</i>  | Cinnamaldehyde                                     | Medium-chain triglyceride | Emulsification    |  | <ul style="list-style-type: none"> <li>MIC value of cinnamaldehyde nanoemulsion was 98 <math>\mu</math>g/mL against <i>E. coli</i>.</li> <li>Effective mechanism: Encapsulation of cinnamaldehyde</li> </ul>                                             | Tian et al. (2016)    |

|    |                |                            |                           |                                       |                               |                                                                                                                                       |                           |
|----|----------------|----------------------------|---------------------------|---------------------------------------|-------------------------------|---------------------------------------------------------------------------------------------------------------------------------------|---------------------------|
|    |                |                            |                           |                                       |                               | showed strong inhibitory effect against <i>E. coli</i> within 9 h of treatment.                                                       |                           |
| 12 | Cinnamon oil   | Eugenol and cinnamaldehyde | Coconut oil, and Tween 80 | Microfluidization and Ultrasonication |                               | <ul style="list-style-type: none"> <li>Nanoemulsion showed promising application in food sector against the <i>E.coli</i>.</li> </ul> | Yildirim et al. (2017)    |
| 13 | Cinnamaldehyde | -                          | Chitosan                  | Ionic gelation                        | <i>Pseudomonas aeruginosa</i> | <ul style="list-style-type: none"> <li>MIC of cinnamaldehyde nanoemulsion against</li> </ul>                                          | Subhaswaraj et al. (2018) |



|    |              |                             |                           |                   |                                                                       |                                                                                                                                                                                                                                                                  |                    |
|----|--------------|-----------------------------|---------------------------|-------------------|-----------------------------------------------------------------------|------------------------------------------------------------------------------------------------------------------------------------------------------------------------------------------------------------------------------------------------------------------|--------------------|
|    |              |                             |                           |                   |                                                                       | <p><i>P. aeruginosa</i> was found to be 1000 µg/mL.</p> <ul style="list-style-type: none"> <li>• Cinnamaldehyde nanoemulsion inhibited quorum sensing activity and prevented food spoilage with controlled as well as slow release at specific sites.</li> </ul> |                    |
| 14 | Cinnamon oil | Cinnamaldehyde and α-pinene | Chitosan and whey protein | Nanoprecipitation | <i>E. coli</i> , <i>P. fragi</i> , and <i>Shewanella putrefaciens</i> | <ul style="list-style-type: none"> <li>• Antibacterial activity of cinnamon oil emulsion against <i>S. aureus</i> was observed at 0.041%.</li> <li>• Cinnamon oil emulsion acted as strong antimicrobial and long-lasting biological molecule</li> </ul>         | Yang et al. (2021) |

|           |                               |             |                                     |                   |                                                    |                                                                                                                                                                                                                                                                                                   |                      |
|-----------|-------------------------------|-------------|-------------------------------------|-------------------|----------------------------------------------------|---------------------------------------------------------------------------------------------------------------------------------------------------------------------------------------------------------------------------------------------------------------------------------------------------|----------------------|
|           |                               |             |                                     |                   |                                                    | against various food contaminating Gram +ve and Gram -ve bacteria indicating utilization as potential preservative in food industry.                                                                                                                                                              |                      |
| <b>15</b> | <i>Rosmarinus officinalis</i> | -           | Chitosan (CS) and benzoic acid (BA) | Sonication        | <i>Salmonella typhimurium</i>                      | <ul style="list-style-type: none"> <li>• Nanogel of <i>R. officinalis</i> showed the MIC value 5 µg/mL against the <i>S. typhimurium</i>.</li> <li>• Nanogel of <i>R. officinalis</i> applied on beef cutlet at the rate of 0.5 mg/g had positive effects on the color and shelf-life.</li> </ul> | Hadian et al. (2017) |
| <b>16</b> | <i>Cinnamodendron dinisii</i> | 1,8-cineole | Chitosan and Zein                   | Nanoprecipitation | <i>S. typhimurium</i> and <i>Shigella flexneri</i> | <ul style="list-style-type: none"> <li>• Nanoemulsion of <i>C. dinisii</i> film showed greater antimicrobial activity against Gram</li> </ul>                                                                                                                                                     | Xavier et al. (2021) |

|    |          |   |          |                   |                             |                                                                                                                                                                                                                                  |                            |
|----|----------|---|----------|-------------------|-----------------------------|----------------------------------------------------------------------------------------------------------------------------------------------------------------------------------------------------------------------------------|----------------------------|
|    |          |   |          |                   |                             | –ve bacteria and stabilized the deterioration reaction in ground beef leading to prolong shelf-life under refrigerated storage.                                                                                                  |                            |
| 17 | Lime oil | - | Chitosan | Nanoprecipitation | <i>Shigella dysenteriae</i> | <ul style="list-style-type: none"> <li>Chitosan nanoparticles incorporating lime EO performed highest antibacterial activity against <i>S. dysenteriae</i> and inhibition halo (HI) value was 3.5 cm at 40 µL volume.</li> </ul> | Sotelo-Boyás et al. (2017) |

Table 2. Antifungal efficacy of EOs nanoemulsion in food

| S. No. | Effective over/ Test organism | EO/Component (nanoemulsion)  | Effective constituents                                          | Biopolymer | Method         | Key findings                                                                                                                                                                                                                                                                                                                                                                                                                           | References              |
|--------|-------------------------------|------------------------------|-----------------------------------------------------------------|------------|----------------|----------------------------------------------------------------------------------------------------------------------------------------------------------------------------------------------------------------------------------------------------------------------------------------------------------------------------------------------------------------------------------------------------------------------------------------|-------------------------|
| 1      | <i>A. flavus</i>              | <i>Origanum majorana</i>     | Terpinen-4-ol, $\alpha$ -terpineol, linalool, and caryophyllene | Chitosan   | Ionic gelation | <ul style="list-style-type: none"> <li>MIC of <i>O. majorana</i> EO nanoemulsion was observed to be 1<math>\mu</math>L/mL against <i>A. flavus</i>.</li> <li>Effective mechanism: <i>O. majorana</i> EO nanoemulsion showed remarkable inhibitory efficacy against the <i>A. flavus</i> growth and AFB<sub>1</sub> production as compared to free <i>O. majorana</i> EO by enhancing reduction of ergosterol concentration.</li> </ul> | Chaudhari et al. (2020) |
| 2      |                               | <i>Eugenia caryophyllata</i> | Eugenol and caryophyllene                                       | Chitosan   | Sonication     | <ul style="list-style-type: none"> <li><i>E. caryophyllata</i> EO nanoemulsion showed remarkable antifungal (0.25 <math>\mu</math>L/mL) and aflatoxin B<sub>1</sub></li> </ul>                                                                                                                                                                                                                                                         | Kujur et al. (2021)     |

|   |  |                        |   |                           |                   |                                                                                                                                                                                                                                                                                                                     |                       |
|---|--|------------------------|---|---------------------------|-------------------|---------------------------------------------------------------------------------------------------------------------------------------------------------------------------------------------------------------------------------------------------------------------------------------------------------------------|-----------------------|
|   |  |                        |   |                           |                   | <p>inhibitory (0.15 <math>\mu\text{L}/\text{mL}</math>) activity.</p> <ul style="list-style-type: none"> <li>• <i>E. caryophyllata</i> EO nanoemulsion exhibited promising fungitoxic, aflatoxin B<sub>1</sub> inhibitory activity and preserved the sensory properties of six month stored maize seeds.</li> </ul> |                       |
| 3 |  | <i>Cuminum cyminum</i> | - | Chitosan and Caffeic acid | Sonication        | <ul style="list-style-type: none"> <li>• Encapsulated <i>C. cyminum</i> EO showed promising MIC (350 ppm) against <i>A. flavus</i> under sealed condition as compared to free oil (650 ppm).</li> </ul>                                                                                                             | Zhaveh et al. (2015)  |
| 4 |  | Orange oil             | - | $\beta$ -cyclodextrin     | Inclusion complex | <ul style="list-style-type: none"> <li>• Orange EO nanoemulsion showed complete inhibition at 900 mg/mL.</li> <li>• Nanoencapsulated EO improved the antimicrobial activity in contaminated cakes</li> </ul>                                                                                                        | Kringel et al. (2021) |

|   |                 |                              |                             |          |                |                                                                                                                                                                                                                                                                                                                                                                                                                                            |                            |
|---|-----------------|------------------------------|-----------------------------|----------|----------------|--------------------------------------------------------------------------------------------------------------------------------------------------------------------------------------------------------------------------------------------------------------------------------------------------------------------------------------------------------------------------------------------------------------------------------------------|----------------------------|
| 5 |                 | <i>Cananga odorata</i>       | Linalool and benzyl acetate | Chitosan | Ionic gelation | <ul style="list-style-type: none"> <li>• <i>C. odorata</i> EO nanoemulsion reduced the <i>A. flavus</i> growth and aflatoxin B<sub>1</sub> secretion at 1.0 and 0.75 <math>\mu\text{L}/\text{mL}</math>, respectively.</li> </ul>                                                                                                                                                                                                          | Upadhyay et al. (2021)     |
| 6 |                 | Eugenol                      | -                           | Chitosan | Ionic gelation | <ul style="list-style-type: none"> <li>• Eugenol nanoemulsion showed antifungal and aflatoxin B<sub>1</sub> inhibitory activity at 0.07 and 0.06 <math>\mu\text{L}/\text{mL}</math> concentration, respectively.</li> <li>• Eugenol-loaded chitosan nanoemulsion significantly protected the rice seeds from fungal, AFB<sub>1</sub> contamination, lipid peroxidation and maintained their mineral contents and macronutrients</li> </ul> | Das et al. (2021a)         |
| 7 | <i>A. niger</i> | <i>Eugenia caryophyllata</i> | Eugenol                     | Chitosan | Ionic gelation | <ul style="list-style-type: none"> <li>• Inhibition of <i>A. niger</i> mycelial growth was 1.5 mg/mL.</li> </ul>                                                                                                                                                                                                                                                                                                                           | Hasheminejad et al. (2019) |

|    |                       |                      |                                                                    |              |                              |                                                                                                                                                                                                                                                                               |                             |
|----|-----------------------|----------------------|--------------------------------------------------------------------|--------------|------------------------------|-------------------------------------------------------------------------------------------------------------------------------------------------------------------------------------------------------------------------------------------------------------------------------|-----------------------------|
| 8  |                       | Cinnamon leaf oil    | Eugenol, benzyl benzoate, caryophyllene, and aceteeugenol          | Whey protein | High pressure homogenization | <ul style="list-style-type: none"> <li>• 0.25 µg/mL concentration of CEO inhibited 75% fungal population, whereas, the same concentration in nanoemulsion form was noted to completely inhibit <i>A. niger</i> population.</li> </ul>                                         | Ribes et al. (2017)         |
| 9  | <i>A. parasiticus</i> | <i>Schinus molle</i> | D-limonene, o-cimene, β-phellandrene, δ-cadinene and caryophyllene | Chitosan     | Ionotropic gelation          | <ul style="list-style-type: none"> <li>• Nanoencapsulated <i>S. molle</i> EO at 500 µg/mL concentration showed strong antifungal and antiaflatoxigenic activity.</li> </ul>                                                                                                   | López-Meneses et al. (2018) |
| 10 |                       | <i>Schinus molle</i> | D-limonene, β-phellandrene, and o-cimene                           | Chitosan     | Nanoprecipitation            | <ul style="list-style-type: none"> <li>• <i>S. molle</i> EO nanoemulsion effectively reduced (40-50%) viable spores of <i>A. parasiticus</i>.</li> <li>• Antifungal effect of emulsion due to cytoplasmic coagulation, protoplast leakage and loss of conidiation.</li> </ul> | Luque-Alcaraz et al. (2016) |

|    |                                                           |                         |                                                                                                                            |                       |                            |                                                                                                                                                                                                                                                                                                                                                                             |                               |
|----|-----------------------------------------------------------|-------------------------|----------------------------------------------------------------------------------------------------------------------------|-----------------------|----------------------------|-----------------------------------------------------------------------------------------------------------------------------------------------------------------------------------------------------------------------------------------------------------------------------------------------------------------------------------------------------------------------------|-------------------------------|
| 11 | <i>Alternaria alternata</i>                               | <i>Origanum vulgare</i> | $\alpha$ -pinene, $\beta$ -myrcene, carvacrol, borneol, caryophyllene, $\gamma$ -terpinene, $\rho$ -cymene and terpinolene | Chitosan              | Electrospraying deposition | <ul style="list-style-type: none"> <li>• Oil loaded chitosan emulsion showed antifungal activity associated with destruction of cell membrane permeability as well as remarkable depolarization of membrane.</li> <li>• Oregano EO loaded nanoemulsion can be used in agriculture and food industry as a promising fungicidal agent against <i>A. alternata</i>.</li> </ul> | Yilmaz et al. (2019)          |
| 12 |                                                           | $\alpha$ -pinene        | -                                                                                                                          | Chitosan              | Nanoprecipitation          | <ul style="list-style-type: none"> <li>• Nanoemulsion inhibited <i>A. alternata</i> growth during the cold storage of bell peppers and maintained the physiochemical property</li> </ul>                                                                                                                                                                                    | Hernández-López et al. (2020) |
| 13 | <i>Penicillium italicum</i><br><i>P. digitatum</i><br>and | <i>Litsea cubeba</i>    | Neral and limonene                                                                                                         | $\beta$ -cyclodextrin | Inclusion complex          | <ul style="list-style-type: none"> <li>• MIC values of <i>L. cubeba</i> EO nanoemulsion was found to be 3.13, 1.56, and 0.78 mg/mL against <i>P. italicum</i>, <i>P.</i></li> </ul>                                                                                                                                                                                         | Wang et al. (2020)            |



|           |                                            |                           |                                                            |          |                 |                                                                                                                                                                                                                                                                            |                         |
|-----------|--------------------------------------------|---------------------------|------------------------------------------------------------|----------|-----------------|----------------------------------------------------------------------------------------------------------------------------------------------------------------------------------------------------------------------------------------------------------------------------|-------------------------|
|           | <i>Geotrichum citri-aurantii</i>           |                           |                                                            |          |                 | <p><i>digitatum</i> and <i>G. candidum</i>, respectively.</p> <ul style="list-style-type: none"> <li>• <i>L. cubeba</i> EO nanoemulsion exhibited antifungal activity and preserved citrus fruits from postharvest decay and disease.</li> </ul>                           |                         |
| <b>14</b> | <i>P. chrysogenum</i> and <i>A. flavus</i> | <i>Ocimum basilicum</i>   | Methyl chavicol and linalool                               | Saponin  | Ultrasonication | <ul style="list-style-type: none"> <li>• The nanoemulsion of basil oil had higher antifungal activity against food spoilage fungi. Nanoemulsion at 1000 ppm concentration displayed 64-67% inhibitory activity over <i>P. chrysogenum</i> and <i>A. flavus</i>.</li> </ul> | Gundewadi et al. (2018) |
| <b>15</b> | <i>Fusarium graminearum</i>                | <i>Cymbopogon martini</i> | Geraniol, geranial, geranyl propionate and geranyl acetone | Chitosan | Ionic gelation  | <ul style="list-style-type: none"> <li>• <i>C. martini</i> EO nanoemulsion completely inhibited the growth of <i>F. graminearum</i> and mycotoxins at 700 and 900 ppm.</li> <li>• <i>C. martini</i> EO nanoemulsion showed remarkable</li> </ul>                           | Kalagatur et al. (2018) |

|  |  |  |  |  |  |                                                                                                                            |  |
|--|--|--|--|--|--|----------------------------------------------------------------------------------------------------------------------------|--|
|  |  |  |  |  |  | antifungal and<br>antimycotoxigenic activity<br>against <i>F. graminearum</i><br>during 28 days storage of<br>maize grain. |  |
|--|--|--|--|--|--|----------------------------------------------------------------------------------------------------------------------------|--|

Table 3. Application of nanoencapsulated EO in active packaging of food products

| S. No. | Essential oil or their active ingredients | Packaging types/ Emulsifier/Carrier      | Food products         | Type of microorganism                                                        | Biological activity                                                                                                                                                                                                                                                                                                                                                                                                                                                | Reference              |
|--------|-------------------------------------------|------------------------------------------|-----------------------|------------------------------------------------------------------------------|--------------------------------------------------------------------------------------------------------------------------------------------------------------------------------------------------------------------------------------------------------------------------------------------------------------------------------------------------------------------------------------------------------------------------------------------------------------------|------------------------|
| 1      | Citral                                    | Tween 80/Sodium alginate                 | Pineapple fruit       | <i>Salmonella enterica</i> S. <i>typhimurium</i> and <i>L. monocytogenes</i> | <ul style="list-style-type: none"> <li>• Sodium alginate based edible coating of different concentration of citral nanoemulsion i.e. 0.1% (NE1), 0.5% (NE2), and 1% (NE3) significantly reduced the microbial load of fresh cut pineapples during storage for 12 days.</li> <li>• High concentration of citral in NE3 led to improvement in the sensory quality and texture of pineapple, thus the NE2 could be explored as for commercial application.</li> </ul> | Prakash et al. (2020)  |
| 2      | Carvacrol                                 | Tween 80/ Starch Polymer/Montmorillonite | Vegetables and fruits | <i>E. coli</i>                                                               | <ul style="list-style-type: none"> <li>• Carvacrol nanoemulsion showed strong antimicrobial efficacy in food packaging</li> </ul>                                                                                                                                                                                                                                                                                                                                  | de Souza et al. (2020) |

|   |                        |              |                 |                         |                                                                                                                                                                                                                                                                                                                                                       |                        |
|---|------------------------|--------------|-----------------|-------------------------|-------------------------------------------------------------------------------------------------------------------------------------------------------------------------------------------------------------------------------------------------------------------------------------------------------------------------------------------------------|------------------------|
|   |                        |              |                 |                         | against <i>E. coli</i> due to destabilization and partial destruction of bacterial cell membrane, electron transport, respiration and permeability.                                                                                                                                                                                                   |                        |
| 3 | Linalool               | Tween 80     | Pineapple fruit | <i>S. typhimurium</i>   | <ul style="list-style-type: none"> <li>• Nanoemulsion biofilm on the surface of cut pineapple effectively reduced the <i>S. typhimurium</i> and increased the shelf life of cut pineapple.</li> <li>• Nanoemulsion enhanced twofold antibacterial activity against <i>S. typhimurium</i> by increasing ability to cell membrane integrity.</li> </ul> | Prakash et al. (2019)  |
| 4 | <i>Origanum virens</i> | Whey protien | Sausages        | <i>L. monocytogenes</i> | <ul style="list-style-type: none"> <li>• Coating of Portuguese sausage delayed the lipid peroxidation and inhibited the growth of <i>L. monocytogenes</i> during storage condition.</li> <li>• EO coating enhanced the antibacterial activity of oil via</li> </ul>                                                                                   | Catarino et al. (2017) |

|   |                                                      |                                     |                   |                                                                 |                                                                                                                                                                                                                                                                                                                              |                           |
|---|------------------------------------------------------|-------------------------------------|-------------------|-----------------------------------------------------------------|------------------------------------------------------------------------------------------------------------------------------------------------------------------------------------------------------------------------------------------------------------------------------------------------------------------------------|---------------------------|
|   |                                                      |                                     |                   |                                                                 | sustained release as well as increased the solubility of oil.                                                                                                                                                                                                                                                                |                           |
| 5 | <i>Rosmarinus officinalis</i>                        | Chitosan/ $\epsilon$ -Poly-L-lysine | Carbonado chicken | All types of microorganism viz. Coliform, molds and Yeast       | <ul style="list-style-type: none"> <li>• Total bacterial count reduced effectively by nanoemulsion coating and enhances the shelf life of carbonado chicken meat during 6 days storage.</li> <li>• Similar results found in case of Yeast and molds.</li> </ul>                                                              | Huang et al. (2020)       |
| 6 | <i>Zataria multiflora</i> and <i>Bunium persicum</i> | Tween 80/ Chitosan                  | Turkey fillet     | <i>S. enteritidis</i> and <i>L. monocytogens</i>                | <ul style="list-style-type: none"> <li>• Shelf life of turkey fillet could be extended to 9 days by using nanoemulsion containing oil during 20 days storage at refrigeration condition.</li> <li>• Turkey meat coated with nanoemulsion of <i>Zataria multiflora</i> EO (1%) showed best antibacterial activity.</li> </ul> | Keykhosravy et al. (2020) |
| 7 | <i>Thymus vulgaris</i>                               | Tween 80/ Calcium alginates         | Ground beef       | <i>Staphylococcus aureus</i> , <i>E. coli</i> , Yeast and Molds | <ul style="list-style-type: none"> <li>• Active biopolymer films revealed high antimicrobial activity in agar test agar</li> </ul>                                                                                                                                                                                           | Almasi et al. (2021)      |

|    |                                                |                       |                       |                                         |                                                                                                                                                                                                                                    |                       |
|----|------------------------------------------------|-----------------------|-----------------------|-----------------------------------------|------------------------------------------------------------------------------------------------------------------------------------------------------------------------------------------------------------------------------------|-----------------------|
|    |                                                |                       |                       |                                         | diffusion tests, when apply to package ground beef.                                                                                                                                                                                |                       |
| 8  | Lemmon grass oil                               | Tween 80/<br>Chitosan | Grape berries         | <i>S. typhimurium</i>                   | <ul style="list-style-type: none"> <li>The nanoemulsion coating showed greater efficiency in microbial safety against <i>Salmonella</i> and preserving ready-to-eat grape berries.</li> </ul>                                      | Oh et al. (2017)      |
| 9  | <i>Ferulago angulate</i>                       | Gelatin-Chitosan      | Turkey Meat           | <i>S. aureus</i> and Coliform           | <ul style="list-style-type: none"> <li>Turkey meat packed with gelatin-chitosan film containing 0.5% <i>Ferulago angulate</i> EO reduced the microbial growth and enhances the shelf life of preserved the turkey meat.</li> </ul> | Naseri et al. (2020)  |
| 10 | <i>Cuminum cyminum</i> and <i>Piper nigrum</i> | Tween 80              | Fruits and vegetables | <i>E. coli</i> , and <i>S. enterica</i> | <ul style="list-style-type: none"> <li>Cumin and pepper oil nanoemulsion inhibited the bacterial population on fruits and vegetable by forming biofilm.</li> <li>MIC of Cumin oil nanoemulsion against <i>E. coli</i>,</li> </ul>  | Amrutha et al. (2017) |

|    |                           |                                                                             |              |                                                     |                                                                                                                                                                                                                                                                                    |                              |
|----|---------------------------|-----------------------------------------------------------------------------|--------------|-----------------------------------------------------|------------------------------------------------------------------------------------------------------------------------------------------------------------------------------------------------------------------------------------------------------------------------------------|------------------------------|
|    |                           |                                                                             |              |                                                     | <p>and <i>S. enterica</i> was 100 and 80 <math>\mu\text{L}/\text{mL}</math> receptively.</p> <ul style="list-style-type: none"> <li>• MIC of Pepper oil against <i>E. coli</i>, and <i>S. enterica</i> was 120 and 140 <math>\mu\text{L}/\text{mL}</math>, receptively.</li> </ul> |                              |
| 11 | <i>Eryngium campestre</i> | Tween 80/Chitosan                                                           | Cherry fruit | Mesophilic aerobic bacteria                         | <ul style="list-style-type: none"> <li>• Coating on cherries decreased the microbial population and weight loss compared to control during storage.</li> <li>• Coating enhanced the firmness, pH, antioxidant activity and total phenolic content.</li> </ul>                      | Arabpoor et al. (2021)       |
| 12 | Thymol                    | Poly-(lactic acid/poly (butylene-succinateco-adipate) (PLA/PBSA) blend film | Bread        | <i>Aspergillus</i> spp. and <i>Penicillium</i> spp. | <ul style="list-style-type: none"> <li>• The antifungal activity of thymol coated film was very efficacious against the <i>Aspergillus</i> and <i>Penicillium</i> spp. in both packed bread and <i>in vitro</i> condition.</li> </ul>                                              | Suwanamornlert et al. (2020) |
| 13 | Cinnamon Oil              | Tween 80                                                                    | Bread        | <i>P. digitatum</i>                                 | <ul style="list-style-type: none"> <li>• The film having 1.5 and 3% Cinnamon oil showed no</li> </ul>                                                                                                                                                                              | Fasihi et al. (2019)         |

|    |                         |                                            |         |                 |                                                                                                                                                                                                                                                                                                                                                                      |                       |
|----|-------------------------|--------------------------------------------|---------|-----------------|----------------------------------------------------------------------------------------------------------------------------------------------------------------------------------------------------------------------------------------------------------------------------------------------------------------------------------------------------------------------|-----------------------|
|    |                         | /Carboxymethyl cellulose/polyvinyl alcohol |         |                 | <p>mycelial growth of <i>P. digitatum</i> over 60 days incubation of bread.</p> <ul style="list-style-type: none"> <li>• Active coating at 0.5, 1.5 and 3% exhibited complete fungal growth inhibition on bread slices.</li> <li>• Thus, coating showed the higher effectivity in comparison to films during inhibition of fungal growth in bread slices.</li> </ul> |                       |
| 14 | <i>Origanum vulgare</i> | Tween 20/ Basil Seed Gum (BSG)             | Apricot | Yeast and Molds | <ul style="list-style-type: none"> <li>• Coating significantly improved the EO dispersibility.</li> <li>• Coatings of BSG + 6% <i>Origanum</i> oil was showed the most effective in reducing yeast and molds population, extending the shelf life of apricot cuts.</li> </ul>                                                                                        | Hashemi et al. (2017) |



|    |                        |          |               |                                                                                         |                                                                                                                                                                                                                                                                                                                                                                                 |                      |
|----|------------------------|----------|---------------|-----------------------------------------------------------------------------------------|---------------------------------------------------------------------------------------------------------------------------------------------------------------------------------------------------------------------------------------------------------------------------------------------------------------------------------------------------------------------------------|----------------------|
| 15 | <i>Mentha piperata</i> | Chitosan | Grape fruits  | <i>A. niger</i> , <i>Botrytis cinerea</i> , <i>P. expansum</i> and <i>R. stolonifer</i> | <ul style="list-style-type: none"> <li>• The combined effect of chitosan and <i>Mentha</i> oil effectively delayed the rate of grape decay during storage at room and low temperature.</li> <li>• Coatings of grape barriers strongly reduced the mold infections by increasing antibacterial activity of coatings.</li> </ul>                                                  | Guerra et al. (2016) |
| 16 | Cinnamon Oil           | Chitosan | Cherry Fruits | <i>P. citrinum</i> and <i>A. flavus</i>                                                 | <ul style="list-style-type: none"> <li>• Cinnamon oil improved the growth inhibition of <i>P. citrinum</i> from 33.17 mm to 36.23 mm with increasing concentration from 1% to 4% respectively.</li> <li>• Similar result obtained in case of <i>A. flavus</i>. Growth inhibition from 31.12 mm to 35.28 mm with increasing concentration from 1% to 4% respectively.</li> </ul> | Xing et al. (2016)   |

|    |                  |                |     |                   |                 |                                                                                                                                                                                                                                                                                                |                               |
|----|------------------|----------------|-----|-------------------|-----------------|------------------------------------------------------------------------------------------------------------------------------------------------------------------------------------------------------------------------------------------------------------------------------------------------|-------------------------------|
| 17 | Lemmon grass oil | Flaxseed (FSG) | Gum | Pomegranate Arils | Yeast and Molds | <ul style="list-style-type: none"> <li>• The coating enhanced the potential of oil to enter the cell and improves the interaction between cell and oil.</li> <li>• The coatings significantly reduce the number of microbes and maintain the intrinsic colour of pomegranate arils.</li> </ul> | Yousuf, and Srivastava (2017) |
|----|------------------|----------------|-----|-------------------|-----------------|------------------------------------------------------------------------------------------------------------------------------------------------------------------------------------------------------------------------------------------------------------------------------------------------|-------------------------------|

Supplementary references:

- Almasi, L., Radi, M., Amiri, S., and McClements, D. J. (2021). Fabrication and characterization of antimicrobial biopolymer films containing essential oil-loaded microemulsions or nanoemulsions. *Food Hydrocoll.*, 117, 106733. <https://doi.org/10.1016/j.foodhyd.2021.106733>
- Amrutha, B., Sundar, K., and Shetty, P. H. (2017). Spice oil nanoemulsions: Potential natural inhibitors against pathogenic *E. coli* and *Salmonella* spp. from fresh fruits and vegetables. *LWT.*, 79, 152-159. <https://doi.org/10.1016/j.lwt.2017.01.031>
- Arabpoor, B., Yousefi, S., Weisany, W., and Ghasemlou, M. (2021). Multifunctional coating composed of *Eryngium campestre* L. essential oil encapsulated in nano-chitosan to prolong the shelf-life of fresh cherry fruits. *Food Hydrocoll.*, 111, 106394. <https://doi.org/10.1016/j.foodhyd.2020.106394>
- Bagheri, R., Ariaei, P., and Motamedzadegan, A. (2021). Characterization, antioxidant and antibacterial activities of chitosan nanoparticles loaded with nettle essential oil. *J. Food Meas. Charact.* 15(2), 1395-1402. <https://doi.org/10.1007/s11694-020-00738-0>
- Catarino, M. D., Alves-Silva, J. M., Fernandes, R. P., Gonçalves, M. J., Salgueiro, L. R., Henriques, M. F., et al., (2017). Development and performance of whey protein active coatings with *Origanum virens* essential oils in the quality and shelf life improvement of processed meat products. *Food Cont.*, 80, 273-280. <https://doi.org/10.1016/j.foodcont.2017.03.054>
- Chaudhari, A. K., Singh, V. K., Das, S., Prasad, J., Dwivedy, A. K., and Dubey, N. K. (2020). Improvement of in vitro and in situ antifungal, AFB<sub>1</sub> inhibitory and antioxidant activity of *Origanum majorana* L. essential oil through nanoemulsion and recommending as novel food preservative. *Food Chem. Toxicol.* 143, 111536. <https://doi.org/10.1016/j.fct.2020.111536>
- Cui, H., Bai, M., and Lin, L. (2018). Plasma-treated poly (ethylene oxide) nanofibers containing tea tree oil/beta-cyclodextrin inclusion complex for antibacterial packaging. *Carbohydr. Polym.* 179, 360-369. <https://doi.org/10.1016/j.carbpol.2017.10.011>

- Das, S., Singh, V. K., Dwivedy, A. K., Chaudhari, A. K., and Dubey, N. K. (2021a). Eugenol loaded chitosan nanoemulsion for food protection and inhibition of Aflatoxin B1 synthesizing genes based on molecular docking. *Carbohydr. Polym.* 255, 117-339. <https://doi.org/10.1016/j.carbpol.2020.117339>
- de Souza, A. G., Dos Santos, N. M. A., da Silva Torin, R. F., and dos Santos Rosa, D. (2020). Synergic antimicrobial properties of Carvacrol essential oil and montmorillonite in biodegradable starch films. *Int. J. Biol. Macromol.*, 164, 1737-1747. <https://doi.org/10.1016/j.ijbiomac.2020.07.226>
- Fasihi, H., Noshirvani, N., Hashemi, M., Fazilati, M., Salavati, H., and Coma, V. (2019). Antioxidant and antimicrobial properties of carbohydrate-based films enriched with cinnamon essential oil by Pickering emulsion method. *Food Packag. Shelf Life.*, 19, 147-154. <https://doi.org/10.1016/j.fpsl.2018.12.007>
- Granata, G., Stracquadiano, S., Leonardi, M., Napoli, E., Consoli, G. M. L., Cafiso, V., et al. (2018). Essential oils encapsulated in polymer-based nanocapsules as potential candidates for application in food preservation. *Food Chem.* 269, 286-292. <https://doi.org/10.1016/j.foodchem.2018.06.140>
- Guerra, I. C. D., de Oliveira, P. D. L., Santos, M. M. F., Lúcio, A. S. S. C., Tavares, J. F., Barbosa-Filho, J. M., et al., (2016). The effects of composite coatings containing chitosan and *Mentha* (piperita L. or x villosa Huds) essential oil on postharvest mold occurrence and quality of table grape cv. Isabella. *Innov Food Sci Emerg Technol.*, 34, 112-121. <https://doi.org/10.1016/j.ifset.2016.01.008>
- Gundewadi, G., Sarkar, D. J., Rudra, S. G., and Singh, D. (2018). Preparation of basil oil nanoemulsion using *Sapindus mukorossi* pericarp extract: Physico-chemical properties and antifungal activity against food spoilage pathogens. *Ind. Crops Prod.* 125, 95-104. <https://doi.org/10.1016/j.indcrop.2018.08.076>
- Hadian, M., Rajaei, A., Mohsenifar, A., and Tabatabaei, M. (2017). Encapsulation of *Rosmarinus officinalis* essential oils in chitosan-benzoic acid nanogel with enhanced antibacterial activity in beef cutlet against *Salmonella typhimurium* during refrigerated storage. *LWT*, 84, 394-401. <https://doi.org/10.1016/j.lwt.2017.05.075>

- Hadidi, M., Pouramin, S., Adinepour, F., Haghani, S., and Jafari, S. M. (2020). Chitosan nanoparticles loaded with clove essential oil: Characterization, antioxidant and antibacterial activities. *Carbohydr. Polym.* 236, 116-075. <https://doi.org/10.1016/j.carbpol.2020.116075>
- Hashemi, S. M. B., Khaneghah, A. M., Ghahfarrokhi, M. G., and Eş, I. (2017). Basil-seed gum containing *Origanum vulgare* subsp. *viride* essential oil as edible coating for fresh cut apricots. *Postharvest Biol. Technol.*, 125, 26-34. <https://doi.org/10.1016/j.postharvbio.2016.11.003>
- Hasheminejad, N., Khodaiyan, F., and Safari, M. (2019). Improving the antifungal activity of clove essential oil encapsulated by chitosan nanoparticles. *Food Chem.* 275, 113-122. <https://doi.org/10.1016/j.foodchem.2018.09.085>
- Hernández-López, G., Ventura-Aguilar, R. I., Correa-Pacheco, Z. N., Bautista-Baños, S., and Barrera-Necha, L. L. (2020). Nanostructured chitosan edible coating loaded with  $\alpha$ -pinene for the preservation of the postharvest quality of *Capsicum annuum* L. and *Alternaria alternata* control. *Int. J. Biol. Macromol.*, 165, 1881-1888. <https://doi.org/10.1016/j.ijbiomac.2020.10.094>
- Huang, M., Wang, H., Xu, X., Lu, X., Song, X., and Zhou, G. (2020). Effects of nanoemulsion-based edible coatings with composite mixture of rosemary extract and  $\epsilon$ -poly-L-lysine on the shelf life of ready-to-eat carbonado chicken. *Food Hydrocoll.*, 102, 105576. <https://doi.org/10.1016/j.foodhyd.2019.105576>
- Kalagatur, N. K., Nirmal Ghosh, O. S., Sundararaj, N., and Mudili, V. (2018). Antifungal activity of chitosan nanoparticles encapsulated with *Cymbopogon martinii* essential oil on plant pathogenic fungi *Fusarium graminearum*. *Front. pharmacol.* 9, 610. <https://doi.org/10.3389/fphar.2018.00610>
- Keykhosravy, K., Khanzadi, S., Hashemi, M., and Azizzadeh, M. (2020). Chitosan-loaded nanoemulsion containing *Zataria multiflora* Boiss and *Bunium persicum* Boiss essential oils as edible coatings: Its impact on microbial quality of turkey meat and fate of inoculated pathogens. *Int. J. Biol. Macromol.*, 150, 904-913. <https://doi.org/10.1016/j.ijbiomac.2020.02.092>

- Kringel, D. H., Lang, G. H., Dias, Á. R. G., Gandra, E. A., Valente Gandra, T. K., and da Rosa Zavareze, E. (2021). Impact of encapsulated orange essential oil with  $\beta$ -cyclodextrin on technological, digestibility, sensory properties of wheat cakes as well as *Aspergillus flavus* spoilage. *J. Sci. Food Agric.* <https://doi.org/10.1002/jsfa.11211>
- Kujur, A., Kumar, A., and Prakash, B. (2021). Elucidation of antifungal and aflatoxin B<sub>1</sub> inhibitory mode of action of *Eugenia caryophyllata* L. essential oil loaded chitosan nanomatrix against *Aspergillus flavus*. *Pestic. Biochem. Physiol.* 172, 104755. <https://doi.org/10.1016/j.pestbp.2020.104755>
- Lin, L., Gu, Y., and Cui, H. (2019). Moringa oil/chitosan nanoparticles embedded gelatin nanofibers for food packaging against *Listeria monocytogenes* and *Staphylococcus aureus* on cheese. *Food Packag. Shelf Life.* 19, 86-93. <https://doi.org/10.1016/j.fpsl.2018.12.005>
- López-Meneses, A. K., Plascencia-Jatomea, M., Lizardi-Mendoza, J., Fernández-Quiroz, D., Rodríguez-Félix, F., Mouriño-Pérez, R. R., et al., (2018). *Schinus molle* L. essential oil-loaded chitosan nanoparticles: Preparation, characterization, antifungal and anti-aflatoxigenic properties. *LWT*, 96, 597-603. <https://doi.org/10.1016/j.lwt.2018.06.013>
- Luque-Alcaraz, A. G., Cortez-Rocha, M. O., Velázquez-Contreras, C. A., Acosta-Silva, A. L., Santacruz-Ortega, H. D. C., Burgos-Hernández, A., et al. (2016). Enhanced antifungal effect of chitosan/pepper tree (*Schinus molle*) essential oil bionanocomposites on the viability of *Aspergillus parasiticus* spores. *J. Nanomater.* 2016. <https://doi.org/10.1155/2016/6060137>
- Moghimi, R., Ghaderi, L., Rafati, H., Aliahmadi, A., and McClements, D. J. (2016b). Superior antibacterial activity of nanoemulsion of *Thymus daenensis* essential oil against *E. coli*. *Food chem.* 194, 410-415. <https://doi.org/10.1016/j.foodchem.2015.07.13>
- Naseri, H. R., Beigmohammadi, F., Mohammadi, R., and Sadeghi, E. (2020). Production and characterization of edible film based on gelatin–chitosan containing *Ferulago angulate* essential oil and its application in the prolongation of the shelf life of turkey meat. *J. Food Process. Preserv.*, 44(8), e14558. <https://doi.org/10.1111/jfpp.14558>

- Oh, Y. A., Oh, Y. J., Song, A. Y., Won, J. S., Song, K. B., and Min, S. C. (2017). Comparison of effectiveness of edible coatings using emulsions containing lemongrass oil of different size droplets on grape berry safety and preservation. *LWT*, 75, 742-750. <https://doi.org/10.1016/j.lwt.2016.10.033>
- Prakash, A., Baskaran, R., and Vadivel, V. (2020). Citral nanoemulsion incorporated edible coating to extend the shelf life of fresh cut pineapples. *LWT*, 118, 108851. <https://doi.org/10.1016/j.lwt.2019.108851>
- Prakash, A., Vadivel, V., Rubini, D., and Nithyanand, P. (2019). Antibacterial and antibiofilm activities of linalool nanoemulsions against *Salmonella typhimurium*. *Food Biosci.*, 28, 57-65. <https://doi.org/10.1016/j.fbio.2019.01.018>
- Radünz, M., dos Santos Hackbart, H. C., Camargo, T. M., Nunes, C. F. P., de Barros, F. A. P., Dal Magro, J., et al., (2020). Antimicrobial potential of spray drying encapsulated thyme (*Thymus vulgaris*) essential oil on the conservation of hamburger-like meat products. *Int. J. Food Microbiol.* 330, 108-696. <https://doi.org/10.1016/j.ijfoodmicro.2020.108696>
- Rakmai, J., Cheirsilp, B., Mejuto, J. C., Torrado-Agrasar, A., and Simal-Gándara, J. (2017). Physico-chemical characterization and evaluation of bio-efficacies of black pepper essential oil encapsulated in hydroxypropyl-beta-cyclodextrin. *Food Hydrocoll. Food hydrocolloids*, 65, 157-164. <https://doi.org/10.1016/j.foodhyd.2016.11.014>
- Ribes, S., Fuentes, A., Talens, P., Barat, J. M., Ferrari, G., and Donsì, F. (2017). Influence of emulsifier type on the antifungal activity of cinnamon leaf, lemon and bergamot oil nanoemulsions against *Aspergillus niger*. *Food Control*. 73, 784-795. <https://doi.org/10.1016/j.foodcont.2016.09.044>
- Sotelo-Boyás, M. E., Correa-Pacheco, Z. N., Bautista-Baños, S., and Corona-Rangel, M. L. (2017). Physicochemical characterization of chitosan nanoparticles and nanocapsules incorporated with lime essential oil and their antibacterial activity against food-borne pathogens. *LWT*, 77, 15-20. <https://doi.org/10.1016/j.lwt.2016.11.022>
- Subhaswaraj, P., Barik, S., Macha, C., Chiranjeevi, P. V., and Siddhardha, B. (2018). Anti quorum sensing and anti biofilm efficacy of cinnamaldehyde encapsulated chitosan nanoparticles

against *Pseudomonas aeruginosa* PAO1. LWT. 97, 752-759.  
<https://doi.org/10.1016/j.lwt.2018.08.011>

- Suwanamornlert, P., Kerddonfag, N., Sane, A., Chinsirikul, W., Zhou, W., and Chonhenchob, V. (2020). Poly (lactic acid)/poly (butylene-succinate-co-adipate) (PLA/PBSA) blend films containing thymol as alternative to synthetic preservatives for active packaging of bread. *Food Packag. Shelf Life.*, 25, 100515. <https://doi.org/10.1016/j.fpsl.2020.100515>
- Tian, W. L., Lei, L. L., Zhang, Q., and Li, Y. (2016). Physical stability and antimicrobial activity of encapsulated cinnamaldehyde by self-emulsifying nanoemulsion. *J. Food Process Eng.*, 39(5), 462-471. <https://doi.org/10.1111/jfpe.12237>
- Upadhyay, N., Singh, V. K., Dwivedy, A. K., Chaudhari, A. K., and Dubey, N. K. (2021). Assessment of nanoencapsulated *Cananga odorata* essential oil in chitosan nanopolymer as a green approach to boost the antifungal, antioxidant and in situ efficacy. *Int. J. Biol. Macromol.* 171, 480-490. <https://doi.org/10.1016/j.ijbiomac.2021.01.024>
- Wang, Y., Yin, C., Cheng, X., Li, G., Yang, S., and Zhu, X. (2020).  $\beta$ -Cyclodextrin inclusion complex containing *Litsea cubeba* essential oil: Preparation, optimization, physicochemical, and antifungal characterization. *Coatings*, 10(9), 850. <https://doi.org/10.3390/coatings10090850>
- Xavier, L.O., Sganzerla, W.G., Rosa, G.B., da Rosa, C.G., Agostinetto, L., de Lima Veeck, A.P., et al., 2021. Chitosan packaging functionalized with *Cinnamodendron dinisii* essential oil loaded zein: A proposal for meat conservation. *Int. J. Biol. Macromol.* 169, pp.183-193. <https://doi.org/10.1016/j.ijbiomac.2020.12.093>
- Xing, Y., Xu, Q., Yang, S. X., Chen, C., Tang, Y., Sun, S., et al., (2016). Preservation mechanism of chitosan-based coating with cinnamon oil for fruits storage based on sensor data. *Sensors.*, 16(7), 1111. <https://doi.org/10.3390/s16071111>
- Yang, K., Liu, A., Hu, A., Li, J., Zen, Z., Liu, Y., et al., 2021. Preparation and characterization of cinnamon essential oil nanocapsules and comparison of volatile components and antibacterial ability of cinnamon essential oil before and after encapsulation. *Food Control.* 123, p.107783. <https://doi.org/10.1016/j.foodcont.2020.107783>



- Yildirim, S. T., Oztop, M. H., and Soyer, Y. (2017). Cinnamon oil nanoemulsions by spontaneous emulsification: Formulation, characterization and antimicrobial activity. *LWT*. 84, 122-128. <https://doi.org/10.1016/j.lwt.2017.05.041>
- Yilmaz, M. T., Yilmaz, A., Akman, P. K., Bozkurt, F., Dertli, E., Basahel, A., et al., (2019). Electro spraying method for fabrication of essential oil loaded-chitosan nanoparticle delivery systems characterized by molecular, thermal, morphological and antifungal properties. *Innov Food Sci Emerg Technol* . 52, 166-178. <https://doi.org/10.1016/j.ifset.2018.12.005>
- Yousuf, B., and Srivastava, A. K. (2017). Flaxseed gum in combination with lemongrass essential oil as an effective edible coating for ready-to-eat pomegranate arils. *Int. J. Biol. Macromol.*, 104, 1030-1038. <https://doi.org/10.1016/j.ijbiomac.2017.07.025>
- Zahi, M. R., El Hattab, M., Liang, H., and Yuan, Q. (2017). Enhancing the antimicrobial activity of d-limonene nanoemulsion with the inclusion of  $\epsilon$ -polylysine. *Food chem.* 221, 18-23. <https://doi.org/10.1016/j.foodchem.2016.10.037>
- Zhaveh, S., Mohsenifar, A., Beiki, M., Khalili, S. T., Abdollahi, A., Rahmani-Cherati, T., et al., (2015). Encapsulation of *Cuminum cyminum* essential oils in chitosan-caffeic acid nanogel with enhanced antimicrobial activity against *Aspergillus flavus*. *Ind. Crops Prod.* 69, 251-256. <https://doi.org/10.1016/j.indcrop.2015.02.028>
